# Supplementary material for: Characterization and genome analysis of virulent phage against phytopathogen Pantoea ananatis and its potential biocontrol application
Source: BMC Microbiol. 2026 Mar 25;26:310. doi: 10.1186/s12866-026-04891-2 (PMC13055002; doi:10.1186/s12866-026-04891-2)
Supplement: Supplementary file 1 — Supplementary Material 1. [file 12866_2026_4891_MOESM1_ESM.xlsx]

## Sheet: Sheet5
Coding	Strand	Start	end	lengeth	aa	Class	Predectided function	Max Score	Total Score	Query Cover	E value	Per. ident	Acc. Len	Accession				Note
1	-	32	199	168	56	1	MAG: phage Gp37Gp68 family protein [Caudoviricetes sp.]	73.6	73.6	0.18	1e-15	0.68	56	XOR96395.1
2	-	209	1069	861	287	1	putative anti-sigma factor [Acinetobacter phage ABPH49]	115	115	0.97	1e-28	0.3077	335	AXN57890.1				transcribe
3	+	1187	1501	315	105	1	hypothetical protein BIS47_12 [Klebsiella phage vB_KpnM_BIS47]	90.1	90.1	0.77	1e-23	0.5244	95	YP_009832519.1
4	+	1501	1644	144	48	2	No significant similarity found
5	+	1648	2193	546	182	1	hypothetical protein [Acinetobacter phage ABPH49]	47.4	47.4	0.89	2e-06	0.3048	121	AXN57954.1
6	+	2195	2539	345	115	1	hypothetical protein [Klebsiella phage 05F01]	49.7	49.7	0.95	2e-06	0.3039	181	BBK09195.1
7	+	2560	3393	834	278	1	hypothetical protein GAP32_162 [Cronobacter phage vB_CsaM_GAP32]	44.7	44.7	0.95	2e-05	0.2891	129	YP_006987267.1
8	+	3412	3885	474	158	1	hypothetical protein [Klebsiella phage 05F01]	171	171	1	7e-54	0.5096	156	BBK09167.1
9	+	3977	5083	1107	369	1	ATPase [Klebsiella phage FKP3]	326	326	0.98	2e-108	0.4714	386	XCI78007.1
10	+	5185	5343	159	53	1	hypothetical protein DXHMKXAF_CDS0019 [Enterobacter phage FENT2]	65.1	65.1	0.85	4e-15	0.6364	50	XQW42306.1
11	+	5345	5644	300	100	1	hypothetical protein [Klebsiella phage FKP3]	85.5	85.5	0.87	3e-21	0.4886	144	XCI77984.1
12	+	5648	6478	831	277	1	hypothetical protein AH01_22 [Pantoea phage AH01]	82.8	82.8	0.21	9e-18	0.6724	184	QZA71140.1
13	+	6480	6920	441	147	1	hypothetical protein [Pseudomonas phage Astolliot]	68.9	68.9	0.97	3e-14	0.3356	145	UOL48645.1
14	+	6921	7268	348	116	1	MAG: hypothetical protein [Caudoviricetes sp.]	66.6	66.6	1	6e-14	0.3103	119	XOR02658.1
15	+	7402	7617	216	72	1	MAG: hypothetical protein [Caudoviricetes sp.]	33.1	33.1	0.63	0.035	0.3778	48	XOR63933.1
16	+	7957	8388	432	144	1	hypothetical protein [Klebsiella phage FKP3]	40	40	0.8	0.001	0.2735	118	XCI78002.1
17	+	8478	8897	420	140	1	MAG: hypothetical protein [Caudoviricetes sp.]	165	165	0.97	2e-52	0.5778	137	XOR02655.1
18	+	8887	9213	327	109	1	No significant similarity found
19	+	9287	9892	606	202	1	hypothetical protein IT22_00127 [Erwinia phage IT22]	134	134	1	4e-38	0.3812	202	UYL22656.1
20	+	9938	10405	468	156	1	hypothetical protein RsoM2USA_387 [Ralstonia phage RsoM2USA]	72	72	0.9	4e-15	0.3448	159	AVH85315.1
21	+	10444	11352	909	303	1	putative endonuclease [Escherichia phage JLBYU50]	154	154	0.93	2e-43	0.3289	330	UGL62076.1
22	+	11364	11525	162	54	1	No significant similarity found
23	+	11525	12199	675	225	1	MazG-like pyrophosphatase [Erwinia phage pEp_SNUABM_01]	57	57	0.41	3e-09	0.4	109	YP_009851769.1
24	+	12199	12393	195	65	1	No significant similarity found
25	+	12390	13076	687	229	1	putative DNA methylase [Erwinia phage Snitter]	288	288	0.98	5e-98	0.6143	224	QXG07633.1
26	+	13073	14542	1470	490	1	DNA helicase [Shewanella sp. phage 1/40]	418	418	0.99	7e-141	0.4555	522	YP_009104135.1
27	+	14535	16187	1653	551	1	hypothetical protein uav_029 [Pseudomonas phage UAVern]	45.1	45.1	0.15	0.002	0.3163	343	QYW06561.1
28	+	16271	16690	420	140	1	hypothetical protein XbC2_43 [Xanthomonas phage XbC2]	75.5	75.5	0.91	8e-17	0.3984	144	UYE98472.1
29	+	16717	16893	177	59	1	hypothetical protein [Klebsiella phage DP]	46.6	46.6	0.83	3e-07	0.4231	85	UYA58223.1
30	+	16886	17191	306	102	1	hypothetical protein [Citrobacter phage Tr1]	51.6	51.6	0.91	2e-08	0.2935	103	WNL63483.1
31	+	17193	17726	534	178	1	MAG TPA: hypothetical protein [Caudoviricetes sp.]	248	248	0.99	2e-83	0.6591	214	DAY73764.1
32	+	17727	17906	180	60	1	hypothetical protein FDG95_gp119 [Pectobacterium phage vB_PcaM_CBB]	66.2	66.2	0.98	5e-15	0.5517	80	YP_009594659.1
33	+	17919	18233	315	105	1	hypothetical protein pEaSNUABM19_00359 [Erwinia phage pEa_SNUABM_19]	142	142	0.87	4e-44	0.7111	99	QXO11505.1
34	+	18233	18625	393	131	1	hypothetical protein A1b_00003 [Klebsiella phage VLCpiA1b]	52.8	52.8	0.95	3e-08	0.3217	144	UVX31195.1
35	+	18618	18827	210	70	1	hypothetical protein DXHMKXAF_CDS0234 [Enterobacter phage FENT2]	37.4	37.4	0.87	0.001	0.3667	79	XQW42519.1
36	+	18840	19301	462	154	1	hypothetical protein [Pseudoalteromonas phage PH357]	78.2	78.2	0.5	1e-17	0.5584	144	APC44432.1
37	+	19305	19700	396	132	1	hypothetical protein POP12_106 [Pectobacterium phage POP12]	81.3	81.3	1	3e-19	0.3359	133	QPI17898.1
38	+	19709	20026	318	106	1	MAG: hypothetical protein [Caudoviricetes sp.]	143	143	0.99	2e-44	0.6538	101	XOQ88030.1
39	+	20038	20271	234	78	1	hypothetical protein LIMEzero_ORF05 [Pantoea phage LIMEzero]	37	37	0.78	0.002	0.3788	83	YP_004539078.1
40	+	20311	20685	375	125	1	hypothetical protein [Klebsiella phage 05F01]	99.8	99.8	0.98	1e-26	0.44	132	BBK09207.1
41	+	20685	21188	504	168	1	macro domain-containing protein [Escherichia coli]	194	194	0.99	9e-63	0.6084	160	WP_229504486.1
42	+	21313	21483	171	57	1	No significant similarity found
43	+	21480	21674	195	65	1	No significant similarity found
44	+	21674	22057	384	128	1	hypothetical protein PP16_gp12 [Pectobacterium phage PP16]	42.4	42.4	0.97	3e-04	0.26	155	YP_009286782.1
45	+	22057	22242	186	62	2	hypothetical protein OMDBNIEC_00016 [Salmonella phage STP-SP5]	37	37	0.98	0.002	0.3906	76	WPJ68502.1
46	+	22248	22649	402	134	1	tRNA amidotransferase [Burkholderia phage BcepSaruman]	53.1	53.1	0.72	3e-08	0.3217	156	YP_009904063.1
47	+	22741	22905	165	55	1	hypothetical protein [Klebsiella phage KP2025]	55.5	55.5	0.96	3e-11	0.4528	55	XCO36266.1
48	+	22905	23144	240	80	1	hypothetical protein Ursula_CDS0303 [Citrobacter phage Ursula]	39.3	39.3	0.63	3e-04	0.4	70	XLZ16324.1
49	+	23141	23380	240	80	1	hypothetical protein FDH54_gp141 [Escherichia phage V18]	35.8	35.8	0.51	0.004	0.4146	46	YP_009602364.1
50	+	23367	23549	183	61	1	No significant similarity found
51	+	23561	23800	240	80	1	MAG: hypothetical protein [Caudoviricetes sp.]	47.4	47.4	0.99	2e-07	0.3718	74	XOR02684.1
52	+	23811	24449	639	213	1	MAG: hypothetical protein [Caudoviricetes sp.]	170	170	0.99	8e-52	0.4459	220	QHJ83782.1
53	+	24458	25516	1059	353	1	membrane protein [Klebsiella phage FKP3]	585	585	1	0.0	0.8409	350	XCI78016.1
54	+	25556	25915	360	120	1	putative NinX protein [Serratia phage vB_SmaM-ChuuTotoro]	85.9	85.9	0.98	3e-21	0.4034	122	URC22349.1
55	+	25917	26105	189	63	1	MAG: hypothetical protein [Caudoviricetes sp.]	35.8	35.8	1	0.003	0.4516	63	XOQ88046.1
56	+	26102	26761	660	220	1	MAG: hypothetical protein [Caudoviricetes sp.]	99	99	0.5	1e-24	0.4771	170	XOR02689.1
57	+	26772	27017	246	82	1	No significant similarity found
58	+	27019	27261	243	81	1	No significant similarity found
59	+	27272	28372	1101	367	1	tellurite resistance protein [Escherichia phage VivaForever]	184	184	0.95	2e-53	0.3342	367	XNS40732.1
60	+	28382	28555	174	58	1	hypothetical protein vBKpMFBKp34_126 [Klebsiella phage vB_KpM_FBKp34]	70.5	70.5	0.86	5e-17	0.6531	57	QQV91971.1
61	+	28548	28748	201	67	1	hypothetical protein [Escherichia phage vB_EcoS_P1338]	52.8	52.8	0.79	7e-10	0.5	58	XBW78009.1
62	+	28748	29500	753	251	1	putative tellurium resistance protein [Klebsiella phage vB_KpM_FBKp34]	274	274	1	5e-92	0.5494	237	QQV91785.1
63	+	29510	29776	267	89	1	hypothetical protein [Escherichia coli]	40	40	1	3e-04	0.3043	89	WP_016069211.1
64	+	29800	30390	591	197	1	general stress protein 16U [Klebsiella phage KP13-26]	156	156	0.99	6e-47	0.44	200	UYL04824.1	UYL04824.1
65	+	30465	30938	474	158	1	MAG: cell wall hydrolase SleB [Caudoviricetes sp.]	226	226	0.99	1e-75	0.671	163	XOQ88053.1
66	+	30935	31267	333	111	1	hypothetical protein [Serratia phage PCH45]	47	47	0.91	1e-06	0.3689	96	YP_011108531.1
67	+	31264	31926	663	221	1	MAG: hypothetical protein [Caudoviricetes sp.]	189	189	0.98	4e-59	0.4358	215	XOQ88056.1
68	+	31928	32320	393	131	1	MAG: hypothetical protein [Caudoviricetes sp.]	75.5	75.5	1	4e-17	0.3759	130	XOQ88057.1
69	+	32358	32930	573	191	1	hypothetical protein MVUOKPPV_CDS0208 [Klebsiella phage phi1_175008]	45.8	45.8	0.97	7e-05	0.3622	186	XKX17605.1
70	+	32945	33187	243	81	1	No significant similarity found
71	+	33187	33408	222	74	1	No significant similarity found
72	+	33474	33719	246	82	1	hypothetical protein XaC1_476 [Xanthomonas phage XaC1]	43.9	43.9	0.65	4e-06	0.3774	62	WNA16115.1
73	+	33719	34156	438	146	1	hypothetical protein vBKpMFBKp34_143 [Klebsiella phage vB_KpM_FBKp34]	73.6	73.6	0.89	5e-16	0.3817	139	QQV91845.1
74	+	34156	34404	249	83	1	hypothetical protein vBKpMFBKp34_144 [Klebsiella phage vB_KpM_FBKp34]	57.8	57.8	0.99	3e-11	0.3214	86	QQV91916.1
75	+	34406	34594	189	63	1	hypothetical protein HWC63_gp031 [Erwinia phage pEp_SNUABM_01]	37.4	37.4	0.85	6e-04	0.4151	56	YP_009851554.1
76	+	34595	35155	561	187	1	hypothetical protein [Citrobacter phage Tr1]	171	171	0.98	5e-53	0.4293	187	WNL63452.1
77	+	35166	35483	318	106	1	hypothetical protein NVP1210O_56 [Vibrio phage 1.210.O._10N.222.52.C2]	114	114	0.9	6e-33	0.5426	108	AUR95678.1
78	+	35483	35788	306	102	1	MAG: hypothetical protein [Caudoviricetes sp.]	145	145	1	2e-45	0.6733	102	XOR02708.1
79	+	35788	36420	633	211	1	hypothetical protein [Citrobacter phage Tr1]	226	226	1	4e-74	0.5213	210	WNL63390.1
80	+	36392	37375	984	328	1	glycosyltransferase [Klebsiella phage phi1_175008]	299	299	0.94	3e-99	0.4954	320	XKX17589.1
81	+	37384	37635	252	84	1	MAG: hypothetical protein [Caudoviricetes sp.]	106	106	1	1e-30	0.5663	83	XOR02711.1
82	+	37651	39459	1809	603	1	DNA primase/helicase [Klebsiella phage vB_KpM_FBKp34]	979	979	0.99	0.0	0.7903	599	QQV91748.1
83	+	39498	41714	2217	739	1	DNA polymerase [Pseudomonas phage vB_PpuM-KoPa-4]	677	677	1	0.0	0.4795	762	WYV99217.1
84	+	41787	42002	216	72	1	MAG: hypothetical protein [Caudoviricetes sp.]	59.7	59.7	0.72	1e-12	0.5385	57	XOQ88074.1
85	+	41986	42186	201	67	1	MAG TPA: transmembrane protein [Caudoviricetes sp.]	69.3	69.3	0.88	3e-16	0.5833	72	DAX46882.1
86	+	42210	43277	1068	356	1	hypothetical protein [Salmonella phage SSBI34]	109	109	0.99	3e-25	0.311	399	QYC52541.1
87	+	43337	43693	357	119	1	endonuclease VII [Shigella phage ESh4]	152	152	0.99	3e-47	0.5812	146	URY10773.1
88	-	43749	44474	726	242	1	hypothetical protein Ea357_113 [Erwinia phage Ea35-70]	152	152	0.99	4e-44	0.3745	238	YP_009004906.1
89	-	44480	45142	663	221	1	hypothetical protein AH06_317 [Erwinia phage AH06]	102	102	0.97	2e-25	0.2917	235	QZA71086.1
90	-	45184	47676	2493	831	1	tail fiber protein [Acinetobacter phage ABPH49]	420	678	0.86	1e-131	0.4641	960	AXN57744.1
91	-	47718	50315	2598	866	1	tail fiber - EPS depolymerase [Pantoea phage vB_PagP-SK1]	560	560	0.75	0.0	0.4669	832	QFR42384.1
92	-	50329	50802	474	158	1	hypothetical protein EPNKCIFM_00085 [Klebsiella phage KP13-16]	106	106	0.99	3e-28	0.4241	161	UYL04387.1
93	-	50816	51145	330	110	1	MAG: hypothetical protein [Caudoviricetes sp.]	169	169	0.99	1e-54	0.7407	108	XOR02723.1
94	-	51156	51716	561	187	1	MAG: putative phage tail fiber assembly protein [Caudoviricetes sp.]	108	108	0.95	2e-28	0.3533	180	XOQ88085.1
95	-	51728	52642	915	305	1	tail fiber protein [Escherichia phage vB_vPM_PD06]	218	218	0.99	6e-68	0.4327	327	YP_009984697.1
96	-	52652	53284	633	211	1	baseplate protein [Escherichia phage phi92]	245	245	1	1e-81	0.5667	209	YP_009012478.1
97	-	53294	54787	1494	498	1	putative baseplate component [Klebsiella phage vB_KpnM_VIK251]	223	223	1	3e-66	0.3084	497	UKS71398.1
98	-	54780	55037	258	86	1	MAG: hypothetical protein [Caudoviricetes sp.]	162	162	1	9e-53	0.9059	85	XOR02728.1
99	-	55050	55574	525	175	1	MAG: baseplate protein [Caudoviricetes sp.]	256	256	1	4e-87	0.6782	174	XOQ88090.1
100	-	55584	56246	663	221	1	baseplate spike [Raoultella phage Ro1]	117	117	0.96	5e-32	0.3391	244	YP_009835865.1
101	-	56253	57227	975	325	1	baseplate hub [Klebsiella phage vB_KpnM_Iguana_ER37]	Klebsiella phage vB_KpnM_Iguana_ER37	3076781	188	188	0.95	5e-57	0.3524	329	WNV45555.1
102	-	57228	57572	345	115	1	phage baseplate plug family protein [Escherichia coli]	126	126	0.9	2e-37	0.5534	137	WP_247177435.1
103	-	57582	58244	663	221	1	MAG: phage conserved protein [Caudoviricetes sp.]	206	206	0.96	8e-66	0.4884	239	XOQ88094.1
104	-	58254	60194	1941	647	1	hypothetical protein EPNKCIFM_00073 [Klebsiella phage KP13-16]	541	541	0.8	0.0	0.5489	647	UYL04375.1
105	-	60194	60442	249	83	1	hypothetical protein vBKpMFBKp34_169 [Klebsiella phage vB_KpM_FBKp34]	65.9	65.9	0.78	1e-14	0.4375	73
106	-	60463	60936	474	158	1	tail assembly chaperone [Raoultella phage Ro1]	77.8	77.8	0.73	3e-18	0.3814	159	YP_009835859.1
107	-	60983	61462	480	160	1	virion structural protein [Klebsiella phage VLCpiM5b]	121	121	0.93	2e-35	0.4392	157	UVX29370.1
108	-	61513	62880	1368	456	1	putative tail sheath protein [Klebsiella phage 05F01]	525	525	0.99	0.0	0.5664	471	BBK09280.1
109	-	62906	63583	678	226	1	tail terminator [Klebsiella phage phi1_175008]	110	110	0.73	2e-28	0.3494	229	XKX17559.1
110	-	63576	63998	423	141	1	minor head protein [Erwinia phage Hena1]	53.9	53.9	0.91	2e-08	0.2662	145	YP_009854359.1
111	-	64042	64515	474	158	1	tail completion or Neck1 protein [Psychrobacter phage pOW20-A]	86.7	86.7	0.8	1e-20	0.376	153	YP_007673363.1
112	-	64515	65024	510	170	1	MAG: hypothetical protein [Caudoviricetes sp.]	268	268	1	6e-92	0.7574	171	XOR02742.1
113	-	65034	65441	408	136	1	MAG: hypothetical protein [Caudoviricetes sp.]	199	199	0.99	1e-65	0.6716	134	XOR02743.1
114	-	65512	66510	999	333	1	major capsid protein [Klebsiella phage vB_KpM_FBKp34]	538	538	1	0.0	0.759	332	QQV91767.1
115	-	66526	66939	414	138	1	putative decoration protein [Klebsiella phage 05F01]	138	138	0.91	9e-42	0.584	130	BBK09287.1
116	-	66959	68059	1101	367	1	MAG: hypothetical protein [Caudoviricetes sp.]	532	532	0.99	0.0	0.7658	365	XOR02746.1
117	-	68059	68529	471	157	1	DNA methyltransferase [Klebsiella phage FKP3]	177	177	0.97	3e-56	0.5513	159	XCI78080.1
118	-	68629	70206	1578	526	1	portal protein [Escherichia phage phi92]	553	553	0.99	0.0	0.5335	522	YP_009012452.1
119	-	70288	71835	1548	516	1	terminase large subunit [Pseudaeromonas phage vB_PpeM_ KLEP7]	645	645	0.99	0.0	0.6321	513	UNY40325.1
120	-	72776	72949	174	58	1	MAG: hypothetical protein [Caudoviricetes sp.]	66.2	66.2	0.96	5e-15	0.4659	95	XOR02755.1
121	-	72971	73147	177	59	1	No significant similarity found
122	-	73300	73563	264	88	1	hypothetical protein HWC28_gp124 [Aeromonas phage 4L372XY]	39.7	39.7	0.71	7e-04	0.381	119	YP_009846923.1
123	-	73619	73717	99	33	1	No significant similarity found
124	-	73733	73981	249	83	1	MAG: hypothetical protein [Caudoviricetes sp.]	84.3	84.3	1	7e-22	0.5244	82	XOR02762.1
125	-	73991	74173	183	61	1	hypothetical protein EPNKCIFM_00047 [Klebsiella phage KP13-16]	58.9	58.9	0.9	4e-12	0.5	92	UYL04355.1
126	-	74223	74621	399	133	1	putative Rz spanin [Escherichia phage vB_EcoM_ESCO9]	58.2	58.2	0.97	3e-10	0.3284	143	UPW37701.1
127	-	74605	74859	255	85	1	hypothetical protein EPNKCIFM_00045 [Klebsiella phage KP13-16]	42.7	42.7	0.44	1e-05	0.5405	61	UYL04353.1
128	-	74860	75051	192	64	1	MAG: hypothetical protein [Caudoviricetes sp.]	54.3	54.3	0.89	2e-10	0.4194	66	XOR02765.1
129	-	75054	75299	246	82	1	No significant similarity found
130	-	75403	75786	384	128	1	hypothetical protein vBKpMFBKp34_191 [Klebsiella phage vB_KpM_FBKp34]	83.6	83.6	0.61	2e-20	0.5316	107	QQV91890.1
131	-	76342	76950	609	203	1	hypothetical protein [Klebsiella phage 05F01]	117	117	0.87	1e-31	0.3693	201	BBK09305.1
